# Supplementary material
Source: bioRxiv or medRxiv preprint supplement (https://www.biorxiv.org/highwire/filestream/69036/field_highwire_adjunct_files/2/216754-11.pdf)
Supplement: Supplementary file [file 216754-11.pdf]

Supplementary Table 2: Driver genes ranked according to the number of regulated modules across all cancers

|           | BLCA | BRCA | COADREAD | GBM | HNSC | KIRC | LAML | LUAD | LUSC | OV | UCEC | Total number of regulated modules |
|-----------|------|------|----------|-----|------|------|------|------|------|----|------|-----------------------------------|
| FSTL1     | 4    | 6    | 0        | 0   | 0    | 1    | 0    | 5    | 3    | 8  | 4    | 31                                |
| IFFO1     | 8    | 2    | 10       | 0   | 0    | 0    | 0    | 2    | 4    | 0  | 3    | 29                                |
| MLPH      | 0    | 14   | 6        | 0   | 1    | 0    | 0    | 0    | 4    | 0  | 3    | 28                                |
| SPARCL1   | 8    | 0    | 0        | 0   | 4    | 2    | 0    | 10   | 2    | 0  | 0    | 26                                |
| CLIP3     | 12   | 0    | 0        | 0   | 0    | 0    | 0    | 3    | 0    | 2  | 7    | 24                                |
| MFAP4     | 0    | 10   | 0        | 0   | 0    | 0    | 0    | 0    | 8    | 2  | 4    | 24                                |
| BEND5     | 5    | 0    | 0        | 0   | 9    | 0    | 0    | 5    | 3    | 0  | 0    | 22                                |
| NUAK1     | 0    | 0    | 6        | 0   | 1    | 0    | 0    | 4    | 1    | 5  | 4    | 21                                |
| CAPS      | 4    | 0    | 1        | 2   | 2    | 2    | 0    | 3    | 2    | 2  | 3    | 21                                |
| PPP1R16B  | 8    | 4    | 0        | 0   | 0    | 0    | 0    | 3    | 4    | 0  | 2    | 21                                |
| OLFML1    | 0    | 6    | 0        | 1   | 0    | 4    | 0    | 0    | 0    | 4  | 6    | 21                                |
| SLA       | 0    | 0    | 7        | 11  | 0    | 0    | 0    | 0    | 0    | 0  | 2    | 20                                |
| DDR2      | 0    | 3    | 0        | 0   | 4    | 3    | 0    | 2    | 2    | 2  | 4    | 20                                |
| CDO1      | 1    | 1    | 7        | 0   | 2    | 0    | 0    | 6    | 0    | 2  | 0    | 19                                |
| C1S       | 8    | 2    | 0        | 4   | 1    | 4    | 0    | 0    | 0    | 0  | 0    | 19                                |
| EFEMP2    | 0    | 4    | 0        | 3   | 0    | 0    | 3    | 4    | 3    | 0  | 2    | 19                                |
| EMILIN1   | 0    | 0    | 0        | 1   | 0    | 0    | 0    | 6    | 5    | 2  | 5    | 19                                |
| OSMR      | 8    | 0    | 9        | 0   | 0    | 0    | 0    | 0    | 0    | 0  | 0    | 17                                |
| SULT1C4   | 6    | 0    | 0        | 0   | 0    | 1    | 1    | 0    | 5    | 4  | 0    | 17                                |
| RARRES3   | 2    | 1    | 0        | 3   | 1    | 0    | 0    | 1    | 0    | 7  | 2    | 17                                |
| CCL5      | 0    | 3    | 0        | 0   | 2    | 1    | 0    | 3    | 3    | 3  | 2    | 17                                |
| TBC1D10C  | 0    | 0    | 0        | 1   | 11   | 1    | 2    | 0    | 0    | 2  | 0    | 17                                |
| SMO       | 0    | 1    | 6        | 0   | 0    | 0    | 0    | 1    | 1    | 6  | 1    | 16                                |
| TRIM22    | 0    | 1    | 4        | 2   | 2    | 0    | 0    | 2    | 1    | 3  | 1    | 16                                |
| GPX2      | 3    | 2    | 1        | 0   | 4    | 0    | 0    | 1    | 4    | 0  | 1    | 16                                |
| IGF1      | 13   | 0    | 0        | 0   | 0    | 0    | 0    | 2    | 0    | 0  | 1    | 16                                |
| RIN1      | 2    | 0    | 0        | 4   | 0    | 2    | 2    | 0    | 4    | 0  | 2    | 16                                |
| BCL2      | 0    | 5    | 0        | 0   | 9    | 0    | 0    | 0    | 2    | 0  | 0    | 16                                |
| ACTA2     | 0    | 2    | 0        | 0   | 0    | 0    | 0    | 0    | 3    | 7  | 4    | 16                                |
| ATP10A    | 0    | 1    | 9        | 0   | 0    | 0    | 2    | 3    | 0    | 0  | 0    | 15                                |
| TGFB3     | 0    | 0    | 9        | 0   | 0    | 4    | 0    | 0    | 0    | 2  | 0    | 15                                |
| DOCK2     | 0    | 1    | 8        | 0   | 0    | 0    | 0    | 0    | 6    | 0  | 0    | 15                                |
| METTL7A   | 0    | 0    | 7        | 0   | 3    | 0    | 0    | 5    | 0    | 0  | 0    | 15                                |
| LTBP3     | 0    | 0    | 5        | 0   | 3    | 0    | 6    | 0    | 0    | 0  | 1    | 15                                |
| CHST10    | 2    | 0    | 4        | 0   | 3    | 2    | 0    | 1    | 3    | 0  | 0    | 15                                |
| DAPP1     | 0    | 0    | 3        | 3   | 0    | 2    | 2    | 2    | 1    | 1  | 1    | 15                                |
| HSPB6     | 0    | 6    | 2        | 0   | 0    | 0    | 0    | 0    | 6    | 0  | 1    | 15                                |
| OLFM1     | 10   | 1    | 2        | 0   | 0    | 0    | 0    | 2    | 0    | 0  | 0    | 15                                |
| SRPX2     | 0    | 0    | 1        | 7   | 0    | 5    | 0    | 2    | 0    | 0  | 0    | 15                                |
| WIPF1     | 10   | 1    | 0        | 0   | 0    | 0    | 0    | 0    | 0    | 0  | 4    | 15                                |
| VIM       | 6    | 3    | 0        | 0   | 5    | 0    | 1    | 0    | 0    | 0  | 0    | 15                                |
| IL2RB     | 6    | 0    | 0        | 0   | 0    | 0    | 5    | 4    | 0    | 0  | 0    | 15                                |
| RECK      | 6    | 0    | 0        | 0   | 5    | 0    | 0    | 0    | 4    | 0  | 0    | 15                                |
| MYEF2     | 5    | 0    | 0        | 0   | 1    | 0    | 2    | 0    | 7    | 0  | 0    | 15                                |
| SELENBP1  | 0    | 0    | 0        | 0   | 0    | 0    | 2    | 7    | 4    | 0  | 2    | 15                                |
| LDOC1     | 0    | 0    | 12       | 0   | 0    | 0    | 2    | 0    | 0    | 0  | 0    | 14                                |
| GYPC      | 0    | 1    | 10       | 0   | 0    | 0    | 0    | 0    | 0    | 0  | 3    | 14                                |
| GBP4      | 0    | 0    | 0        | 0   | 6    | 0    | 3    | 2    | 2    | 1  | 0    | 14                                |
| SPATA18   | 0    | 0    | 0        | 0   | 0    | 0    | 0    | 6    | 0    | 4  | 4    | 14                                |
| CHST3     | 2    | 7    | 4        | 0   | 0    | 0    | 0    | 0    | 0    | 0  | 0    | 13                                |
| CD248     | 6    | 0    | 4        | 0   | 0    | 0    | 3    | 0    | 0    | 0  | 0    | 13                                |
| KIAA1324  | 0    | 0    | 3        | 0   | 0    | 0    | 0    | 0    | 2    | 3  | 5    | 13                                |
| PREX1     | 0    | 1    | 0        | 0   | 12   | 0    | 0    | 0    | 0    | 0  | 0    | 13                                |
| PKIA      | 0    | 1    | 0        | 0   | 2    | 1    | 2    | 0    | 0    | 5  | 2    | 13                                |
| CTSZ      | 0    | 0    | 0        | 3   | 0    | 2    | 8    | 0    | 0    | 0  | 0    | 13                                |
| DOK2      | 0    | 1    | 7        | 0   | 0    | 0    | 0    | 0    | 0    | 3  | 1    | 12                                |
| SOCS3     | 2    | 0    | 6        | 0   | 0    | 0    | 0    | 0    | 0    | 0  | 4    | 12                                |
| TUBGCP6   | 1    | 0    | 4        | 2   | 0    | 0    | 0    | 2    | 2    | 1  | 0    | 12                                |
| SFN       | 0    | 0    | 4        | 0   | 0    | 1    | 0    | 0    | 0    | 4  | 3    | 12                                |
| PKLR      | 0    | 0    | 2        | 0   | 0    | 4    | 6    | 0    | 0    | 0  | 0    | 12                                |
| BIRC3     | 7    | 0    | 0        | 5   | 0    | 0    | 0    | 0    | 0    | 0  | 0    | 12                                |
| TNFAIP8L2 | 7    | 1    | 0        | 3   | 0    | 0    | 0    | 0    | 0    | 0  | 1    | 12                                |
| SV2A      | 1    | 0    | 0        | 0   | 2    | 0    | 0    | 6    | 0    | 0  | 3    | 12                                |
| BCL11A    | 0    | 7    | 0        | 4   | 0    | 0    | 0    | 0    | 1    | 0  | 0    | 12                                |
| SLC44A4   | 0    | 4    | 0        | 0   | 1    | 1    | 0    | 1    | 4    | 0  | 1    | 12                                |
| PTPRCAP   | 0    | 2    | 0        | 0   | 0    | 1    | 6    | 0    | 0    | 2  | 1    | 12                                |
| CYFIP2    | 0    | 0    | 0        | 5   | 0    | 0    | 0    | 0    | 7    | 0  | 0    | 12                                |
| TMEM173   | 0    | 0    | 0        | 2   | 0    | 1    | 1    | 2    | 2    | 4  | 0    | 12                                |
| FLRT2     | 0    | 0    | 8        | 0   | 3    | 0    | 0    | 0    | 0    | 0  | 0    | 11                                |
| TRIB2     | 0    | 0    | 7        | 4   | 0    | 0    | 0    | 0    | 0    | 0  | 0    | 11                                |
| PNMA1     | 5    | 0    | 4        | 2   | 0    | 0    | 0    | 0    | 0    | 0  | 0    | 11                                |
| GJB5      | 5    | 0    | 2        | 0   | 0    | 0    | 0    | 1    | 2    | 0  | 1    | 11                                |
| BCAS1     | 8    | 3    | 0        | 0   | 0    | 0    | 0    | 0    | 0    | 0  | 0    | 11                                |
| OAS2      | 1    | 1    | 0        | 1   | 2    | 0    | 2    | 1    | 1    | 1  | 1    | 11                                |
| CRISPLD1  | 1    | 0    | 0        | 0   | 2    | 0    | 0    | 0    | 1    | 5  | 2    | 11                                |
| CSTA      | 1    | 0    | 0        | 9   | 0    | 0    | 0    | 0    | 1    | 0  | 0    | 11                                |
| PCOLCE    | 0    | 7    | 0        | 0   | 0    | 0    | 0    | 0    | 0    | 4  | 0    | 11                                |
| VTCN1     | 0    | 3    | 0        | 0   | 0    | 0    | 0    | 0    | 1    | 5  | 2    | 11                                |
| GPR171    | 0    | 2    | 0        | 2   | 4    | 0    | 0    | 0    | 2    | 1  | 0    | 11                                |
| ATP8A2    | 0    | 0    | 0        | 7   | 0    | 0    | 0    | 0    | 2    | 2  | 0    | 11                                |
| TLR8      | 0    | 0    | 0        | 7   | 0    | 0    | 4    | 0    | 0    | 0  | 0    | 11                                |
| PLEK      | 0    | 0    | 0        | 5   | 0    | 0    | 0    | 0    | 0    | 4  | 2    | 11                                |

|           |   |   |   |   |    |   |   |   |   |   |   |    |
|-----------|---|---|---|---|----|---|---|---|---|---|---|----|
| CCDC89    | 0 | 0 | 0 | 2 | 0  | 1 | 0 | 3 | 1 | 1 | 3 | 11 |
| PTPRM     | 0 | 0 | 0 | 0 | 10 | 0 | 0 | 0 | 0 | 0 | 1 | 11 |
| LCP1      | 0 | 0 | 0 | 0 | 6  | 1 | 0 | 3 | 1 | 0 | 0 | 11 |
| MSI1      | 0 | 0 | 0 | 0 | 5  | 0 | 0 | 0 | 6 | 0 | 0 | 11 |
| SERPINF1  | 0 | 0 | 0 | 0 | 3  | 5 | 0 | 3 | 0 | 0 | 0 | 11 |
| CMTM3     | 0 | 0 | 7 | 0 | 0  | 1 | 0 | 0 | 1 | 0 | 1 | 10 |
| NCKAP1L   | 0 | 1 | 6 | 0 | 0  | 3 | 0 | 0 | 0 | 0 | 0 | 10 |
| LRRC2     | 0 | 0 | 3 | 0 | 0  | 2 | 0 | 0 | 0 | 0 | 5 | 10 |
| CTTNBP2   | 0 | 4 | 1 | 0 | 2  | 0 | 0 | 0 | 3 | 0 | 0 | 10 |
| DIXDC1    | 7 | 3 | 0 | 0 | 0  | 0 | 0 | 0 | 0 | 0 | 0 | 10 |
| DSE       | 6 | 0 | 0 | 0 | 0  | 0 | 0 | 0 | 4 | 0 | 0 | 10 |
| C14orf132 | 4 | 0 | 0 | 0 | 0  | 6 | 0 | 0 | 0 | 0 | 0 | 10 |
| CTSS      | 2 | 0 | 0 | 0 | 8  | 0 | 0 | 0 | 0 | 0 | 0 | 10 |
| TRIM29    | 0 | 4 | 0 | 0 | 0  | 0 | 0 | 0 | 1 | 5 | 0 | 10 |
| ARAP3     | 0 | 2 | 0 | 0 | 0  | 8 | 0 | 0 | 0 | 0 | 0 | 10 |
| TAGLN     | 0 | 2 | 0 | 0 | 0  | 5 | 0 | 0 | 0 | 1 | 2 | 10 |
| ELOVL4    | 0 | 1 | 0 | 0 | 0  | 0 | 0 | 2 | 0 | 0 | 7 | 10 |
| WNK2      | 0 | 1 | 0 | 0 | 8  | 0 | 0 | 0 | 1 | 0 | 0 | 10 |
| BASP1     | 0 | 0 | 0 | 6 | 1  | 0 | 2 | 0 | 0 | 0 | 1 | 10 |
| KIAA0247  | 0 | 0 | 0 | 3 | 0  | 0 | 0 | 1 | 0 | 6 | 0 | 10 |
| TCF4      | 0 | 0 | 0 | 0 | 6  | 0 | 0 | 0 | 0 | 0 | 4 | 10 |
| ADD2      | 0 | 0 | 0 | 0 | 1  | 0 | 0 | 0 | 8 | 0 | 1 | 10 |
| ATRNL1    | 0 | 0 | 0 | 0 | 0  | 4 | 0 | 0 | 6 | 0 | 0 | 10 |
| RCSD1     | 0 | 0 | 0 | 0 | 0  | 1 | 0 | 3 | 6 | 0 | 0 | 10 |
